# Supplementary material for: Back to Acid Soil Fields: The Citrate Transporter SbMATE Is a Major Asset for Sustainable Grain Yield for Sorghum Cultivated on Acid Soils
Source: PubMed Central journal article supplement (PMC4751565; doi:10.1534/g3.115.025791), 2015-12-17
Supplement: supp_g3.115.025791_TableS1.pdf [file supp_g3.115.025791_TableS1.pdf]

**Table S1** Genetic constitution of the isogenic hybrids, H1 to H8, along with the respective parents. The *Al<sub>SB</sub>* genotypes, AI tolerant (TT), AI sensitive (tt) and heterozygous (Tt) are shown between parentheses.

|                  |            | Male lines (R) |                    |                      |                       |
|------------------|------------|----------------|--------------------|----------------------|-----------------------|
|                  |            | BR012<br>(tt)  | BR012(566)<br>(TT) | BR012(SC549)<br>(TT) | BR012(CMS225)<br>(TT) |
| Female lines (A) | ATF13A(tt) | H1(tt)         | H3(Tt)             | H5(Tt)               | H7(Tt)                |
|                  | ATF14A(TT) | H2(Tt)         | H4(TT)             | H6(TT)               | H8(TT)                |
