# Supplementary material for: Back to Acid Soil Fields: The Citrate Transporter SbMATE Is a Major Asset for Sustainable Grain Yield for Sorghum Cultivated on Acid Soils
Source: PubMed Central journal article supplement (PMC4751565; doi:10.1534/g3.115.025791), 2015-12-17
Supplement: supp_g3.115.025791_TableS2.pdf [file supp_g3.115.025791_TableS2.pdf]

**Table S2** Descriptive statistics for Al saturation (%) in the superficial (0 – 20 cm) and sub-superficial (20 – 40 cm) soil layers in the control and Al toxicity sites.

| Al saturation (%)       | Depth (cm) | Control | Al   |
|-------------------------|------------|---------|------|
| Mean                    | 0 – 20     | 2.1     | 55.9 |
|                         | 20 – 40    | 15.2    | 64.6 |
| Median                  | 0 – 20     | 0.4     | 60.3 |
|                         | 20 – 40    | 9.4     | 67.2 |
| Standard deviation (SD) | 0 – 20     | 5.0     | 18.4 |
|                         | 20 – 40    | 15.8    | 16.1 |
