# Supplementary material for: Back to Acid Soil Fields: The Citrate Transporter SbMATE Is a Major Asset for Sustainable Grain Yield for Sorghum Cultivated on Acid Soils
Source: PubMed Central journal article supplement (PMC4751565; doi:10.1534/g3.115.025791), 2015-12-17
Supplement: supp_g3.115.025791_TableS3.pdf [file supp_g3.115.025791_TableS3.pdf]

**Table S3** Variance components, phenotypic means and heritability ( $h^2$ ) estimates are shown for relative net root growth (RNRG) assessed in hydroponics after five days of Al exposure and grain yield (ton ha<sup>-1</sup>) in control conditions and under high-Al saturation (Al) in the field.

| Effects            | RNRG  | Grain yield (ton ha <sup>-1</sup> ) |      |
|--------------------|-------|-------------------------------------|------|
|                    |       | Control                             | Al   |
| $\hat{\sigma}_g^2$ | 0.09  | 1.12                                | 0.44 |
| $\hat{\sigma}_e^2$ | 0.01  | 0.62                                | 0.55 |
| Mean               | 48.49 | 3.15                                | 2.31 |
| $h^2$              | 0.95  | 0.85                                | 0.71 |
