# Supplementary material for: Back to Acid Soil Fields: The Citrate Transporter SbMATE Is a Major Asset for Sustainable Grain Yield for Sorghum Cultivated on Acid Soils
Source: PubMed Central journal article supplement (PMC4751565; doi:10.1534/g3.115.025791), 2015-12-17
Supplement: supp_g3.115.025791_TableS4.pdf [file supp_g3.115.025791_TableS4.pdf]

**Table S4** Analysis of variance with respective F probabilities of eight isogenic hybrids grown in a split-plot design with four replications and whole plots following a completely randomized design. Treatment (AI versus control) was applied to whole plots, while the hybrids of the full factorial female x male crossing were allocated to the sub plots. Treatment main effects were tested at whole plot level, while all other effects were tested at subplot level.

| Source of Variation     | DF | SS    | MS    | VR    | F Pr. |
|-------------------------|----|-------|-------|-------|-------|
| Environment             | 1  | 14.37 | 14.37 | 6.69* | 0.04  |
| Residual a              | 6  | 12.88 | 2.15  | 2.71  |       |
| Female                  | 1  | 4.07  | 4.07  | 5.14* | 0.03  |
| Male                    | 3  | 3.09  | 1.03  | 1.30  | 0.29  |
| Environment*Female      | 1  | 0.04  | 0.04  | 0.04  | 0.83  |
| Environment*Male        | 3  | 2.67  | 0.89  | 1.13  | 0.35  |
| Female*Male             | 3  | 0.91  | 0.30  | 0.38  | 0.76  |
| Environment*Female*Male | 3  | 1.37  | 0.46  | 0.58  | 0.63  |
| Residual b              | 42 | 33.25 | 0.79  |       |       |

\*Significant at 0.05 probability

DF: degrees of freedom

MS: mean square

SS: sum of squares

VR: variance ratio

F Pr.: probability (F-test).
