# Supplementary material for: Back to Acid Soil Fields: The Citrate Transporter SbMATE Is a Major Asset for Sustainable Grain Yield for Sorghum Cultivated on Acid Soils
Source: PubMed Central journal article supplement (PMC4751565; doi:10.1534/g3.115.025791), 2015-12-17
Supplement: supp_g3.115.025791_TableS5.pdf [file supp_g3.115.025791_TableS5.pdf]

**Table S5** Phenotypic means for grain yield (ton ha<sup>-1</sup>) under control (2% AI saturation) and AI stress (56% AI saturation) conditions in the field for the eight hybrids with distinct allelic combinations at the *Al<sub>SB</sub>* locus as depicted in Table S1.

|             |                  | Male lines (R) |                      |                      |                       |
|-------------|------------------|----------------|----------------------|----------------------|-----------------------|
| Environment | Female lines (A) | BR012<br>(tt)  | BR012(SC566)<br>(TT) | BR012(SC549)<br>(TT) | BR012(CMS225)<br>(TT) |
| Control     | ATF13A(tt)       | 3.93(tt)       | 4.20(Tt)             | 3.88(Tt)             | 3.80(Tt)              |
|             | ATF14A(TT)       | 4.25(Tt)       | 3.97(TT)             | 4.53(TT)             | 4.91(TT)              |
| AI          | ATF13A(tt)       | 2.21(tt)       | 3.31(Tt)             | 3.41(Tt)             | 2.91(Tt)              |
|             | ATF14A(TT)       | 2.94(Tt)       | 3.97(TT)             | 3.60(TT)             | 3.54(TT)              |
